# Supplementary material for: The Ascosphaera apis Infection (Chalkbrood Disease) Alters the Gut Bacteriome Composition of the Honeybee
Source: Pathogens. 2023 May 19;12(5):734. doi: 10.3390/pathogens12050734 (PMC10224485; doi:10.3390/pathogens12050734)
Supplement: Supplementary file 1 [file pathogens-12-00734-s001.zip › Supp Table -1.xlsx]

## Sheet: table S1
				Supplementary Table S1. The bacterial community composition at the phylum level. Percent relative abundances of bacterial taxa at the phylum level are shown for samples. Relative abundances < 1% across all samples are shown as “Others”
	Taxon Name	Control_1	Control_2	Control_3	Control_4	Control_5	nosema_1	nosema_2	nosema_3	nosema_4	nosema_5	chalkbrood_1	chalkbrood_2	chalkbrood_3	chalkbrood_4	weak_1	weak_2	weak_3	weak_4	weak_5
	Acidobacteria	0.0029	0.0029	0.0029	0	0.0086	0	0	0.0029	0	0	0.0286	0.1229	0.04	1.7171	0	0	0	0	0.0257
	Actinobacteria	1.3343	0.3286	0.9943	0.1714	1.46	0.1829	0.1171	0.6971	0.1857	0.44	2.5857	3.0971	2.8571	5.48	0.1657	0.0086	0.0429	0.08	0.22
	Bacteroidetes	0.0057	0	0.2343	13.5771	0.0171	0.0171	5.4829	0.0114	0.0771	0.9457	26.3829	21.1914	33.4829	15.2286	0.3171	0.0171	0.0086	0.0486	0.1029
	Deferribacteres	0	0	0	0	0	0	0	0	0	0	1.0057	1.0743	1.42	0.8257	0	0	0	0	0
	Firmicutes	15.5629	17.1057	6.9486	17.3257	4.2971	11.2429	12.66	19.8114	19.5229	20.2914	67.0229	70.3143	60.5286	58.2657	40.5229	0.9943	3.4514	17.2971	25.5029
	Proteobacteria	83.0743	82.5543	91.8171	68.9171	94.2057	88.3943	81.74	79.2114	80.0029	78.2829	2.1857	2.3971	0.7829	12.42	58.9914	98.9771	96.4971	82.5686	74.04
	Saccharibacteria_TM7	0.0114	0.0057	0.0029	0.0029	0.0057	0	0	0	0	0.0029	0.0571	0.6714	0.1029	2.1686	0	0	0	0	0.0514
	Others	0.0087	0.0029	0	0.0058	0.0058	0.1629	0	0.2657	0.2115	0.0372	0.7316	1.1314	0.7858	3.8943	0.0029	0.0029	0	0.0057	0.0573

## Sheet: table S2
			Supplementary Table S2. The bacterial community composition at the genus level. Percent relative abundances of bacterial taxa at the genus level are shown for samples. Relative abundances < 1% across all samples are shown as “Others”
	Taxon Name	Control_1	Control_2	Control_3	Control_4	Control_5	nosema_1	nosema_2	nosema_3	nosema_4	nosema_5	chalkbrood_1	chalkbrood_2	chalkbrood_3	chalkbrood_4	weak_1	weak_2	weak_3	weak_4	weak_5
	Enterobacteriaceae_g	0.0114	0.0029	0.3571	0.4343	0.1371	57.62	0.0114	0.3086	0.8257	0.0286	0.2086	0.1486	0.0114	0.1057	0.2971	20.5514	0.7714	0.7257	0.1029
	Gilliamella	30.3543	59.2171	78.4143	53.1371	70.16	12.4943	23.5771	24.3086	32.1971	20.12	0.1914	0.0657	0.0543	0.58	52.2286	18.0543	47.4057	44.0029	43.6114
	Enterobacter	0	0	0.1371	0.7914	0	0.0971	0	0.0343	0.0914	0.0086	0.0486	0	0.0057	0.0771	0.16	7.9686	0.1486	0.3457	0.0257
	Enterobacteriaceae_uc	0	0	0.0029	0.02	0	0.0057	0.1314	0.0057	5.4486	0	0	0	0	0	0.0086	4.8886	0.0229	0.0229	0.0086
	Erwinia	0.0029	0	0.0714	0.46	0.0029	0.0257	0.0029	0.2971	0.7657	0	0	0	0.0029	0.0029	0	3.58	1.2714	0.0029	0.0029
	Lactobacillus	15.1886	17.0743	6.9229	13.1514	4.2714	10.7343	12.6429	19.3257	19.4571	20.2714	7.1314	7.5771	10.6686	5.8	40.3943	0.9714	3.4343	17.2686	25.3514
	Erwiniaceae_uc	0	0	0	0	0	0	0.0057	0.0029	0	0	0	0	0	0	0	0.8	0.0171	0	0
	Frischella	14.8114	0.0057	0.04	0.0343	3.7714	0.0486	4.5	33.3171	16.4171	25.1143	0.0314	0.0057	0.0086	0.2371	2.5229	0.76	21.4086	2.7143	21.3143
	Snodgrassella	11.8571	23.1914	7.9629	5.8086	15.26	16.7029	23.36	17.7029	15.0257	30.5714	0.0143	0	0.0086	0.1714	2.6543	0.1657	11.3571	32.6714	4.62
	Asaia	24.7343	0.0057	3.3343	0.1343	3.5	0.0543	0.0771	0.7914	0.48	0.0771	0.0057	0	0.0086	1.6229	0.6657	0.02	0.08	0.5057	2.9029
	Bombella	0.1171	0.0114	0.0143	0.0343	0.0486	0.0029	0.0057	0.0171	3.82	0.0457	0.0114	0	0.0029	0.1057	0.0143	0.02	0.0457	0.0514	0.26
	Schmidhempelia	0.7657	0.0057	0.0114	0.0029	0.4114	0.0029	0.1429	1.2829	1.2943	1.3286	0	0	0	0	0.1657	0.0114	1.0086	0.3629	0.6486
	Bifidobacterium	1.2457	0.3229	0.7743	0.0829	0.0114	0.1829	0.1114	0.6457	0.1771	0.4371	1.6029	1.7486	2.38	1.4343	0.0457	0.0057	0.0286	0.0371	0.0371
	PAC000661_g	0.0057	0.0029	0	0.0057	0	0.0057	0	0.0114	0.0029	0.0029	1.4543	1.5029	1.5286	1.3857	0	0.0057	0.0057	0	0.0086
	Bacillus	0	0	0	0	0	0	0	0	0.0057	0	0	0.36	0.0143	0.2457	0	0.0029	0	0	0.0029
	Eubacterium_g8	0	0	0	0	0	0	0	0	0	0	0.3686	0.42	0.1971	0.1086	0	0.0029	0	0	0
	Herbiconiux	0.0886	0	0.2171	0.0714	1.4429	0	0.0029	0.0514	0.0029	0.0029	0.2457	0.0114	0.0057	1.8829	0.1171	0	0.0114	0.0257	0.1257
	Bartonella	0.3229	0.0686	0.0029	0.7314	0.0143	0.8514	0.0943	0.1629	0.0229	0.48	0.0029	0	0	0	0.0029	0	0.0029	0.1257	0.0286
	Fructobacillus	0.3343	0	0.0086	0.6343	0.0171	0	0.0143	0.4629	0.0486	0	0.0029	0	0	0.0343	0.0343	0	0	0.0029	0.0143
	PAC000677_g	0.0114	0.0057	0.0029	0.0029	0	0	0	0	0	0.0029	0.0571	0.6686	0.0971	2.0943	0	0	0	0	0.0143
	Lactococcus	0.0029	0.0029	0.0029	0	0	0.5029	0	0	0	0	0.1886	0.74	0.0914	1.8743	0.0171	0	0	0	0.0143
	Commensalibacter	0	0	0	0	0	0.32	2.6686	0.0143	0.0514	0.4171	0.0171	0	0	0	0.0086	0	0	0.0029	0.0029
	Pseudoflavonifractor	0	0	0	0.0029	0	0	0	0	0	0	5.76	5.7457	6.0114	2.3943	0.0029	0	0	0	0.0029
	Lachnospiraceae_uc	0	0	0	0	0	0	0	0	0	0	1	1.0657	0.4114	1.0857	0	0	0	0	0.0029
	Ruminococcaceae_uc	0	0	0	0	0	0	0	0	0	0	0.98	1.0343	0.86	0.5514	0	0	0	0	0.0029
	Halomonas	0	0	0	0	0	0	0	0	0	0	0.02	0.4914	0.0971	3.2771	0	0	0	0	0.0029
	Bacteroides	0	0	0	0	0	0	0	0	0	0	0.6086	0.4257	0.6743	0.3943	0	0	0	0.0057	0.0029
	Rahnella	0	0	1.1857	0.0086	0	0	0	0	2.7743	0	0.0229	0.0143	0	0.06	0	0	0.0457	0	0
	KE159538_g	0	0	0.0086	0	0	0	0	0	0	0	8.3657	13.1514	6.84	4.0229	0	0	0	0	0
	PAC001112_g	0	0	0	0	0	0	0	0	0	0	8.8286	6.6971	12.9029	2.8886	0	0	0	0	0
	PAC000664_g	0	0	0	0	0	0	0	0	0	0	6.2314	5.2743	4.8686	2.6171	0	0	0	0	0
	PAC001068_g	0	0	0	0	0	0	0	0	0	0	5.5886	4.6914	7.6286	2.2486	0	0	0	0	0
	Alistipes	0	0	0	0	0	0	0	0	0	0	4.26	3.3	4.0371	1.6143	0	0	0	0	0
	KE159810_g	0	0	0	0	0	0	0	0	0	0	2.8257	2.6914	3.0629	0.9429	0	0	0	0	0
	PAC001165_g	0	0	0	0	0	0	0	0	0	0	2.5943	2.6543	2.5714	0.9229	0	0	0	0	0
	KE159628_g	0	0	0	0	0	0	0	0	0	0	3.2514	2.6143	2.4057	0.7743	0	0	0	0	0
	Oscillibacter	0	0	0	0	0	0	0	0	0	0	2.2571	2.1143	2.6543	1.4286	0	0	0	0	0
	KE159571_g	0	0	0	0	0	0	0	0	0	0	2.1114	1.8943	1.22	0.6657	0	0	0	0	0
	PAC000692_g	0	0	0	0	0	0	0	0	0	0	1.5571	1.5057	1.2971	0.6971	0	0	0	0	0
	PAC000186_g	0	0	0	0.0029	0	0	0	0	0	0	1.94	1.4314	2.34	0.7686	0	0	0	0	0
	PAC001097_g	0	0	0	0	0	0	0	0	0	0	1.8086	1.3686	1.54	0.4571	0	0	0	0	0
	PAC001472_g	0	0	0	0	0	0	0	0	0	0	1.2171	1.3029	1.5657	0.5686	0	0	0	0	0
	PAC001092_g	0	0.0029	0	0	0	0	0	0	0	0	1.0914	1.22	0.9943	0.4886	0	0	0	0	0
	PAC001090_g	0	0	0	0	0	0	0	0	0	0	1.6686	1.1171	0.8914	0.7029	0	0	0	0	0
	Mucispirillum	0	0	0	0	0	0	0	0	0	0	1.0057	1.0743	1.42	0.8257	0	0	0	0	0
	PAC001360_g	0	0	0	0	0	0	0	0	0	0	0.9457	1.04	0.3229	0.2086	0	0	0	0	0
	Clostridium_g21	0	0	0	0	0	0	0	0	0	0	0.5314	0.78	0.4571	0.3971	0	0	0	0	0
	PAC001456_g	0	0	0	0	0	0	0	0	0	0	0.6886	0.7429	0.0829	0.2286	0	0	0	0	0
	PAC000198_g	0	0	0	0	0	0	0	0	0	0	1.1743	0.7143	1.34	0.3486	0	0	0	0	0
	Eubacterium_g17	0	0	0	0	0	0	0	0	0	0	0.7143	0.66	0.4943	0.3257	0	0	0	0	0
	PAC001362_g	0	0	0	0	0	0	0	0	0	0	0.5971	0.66	0.1029	0.1314	0	0	0	0	0
	Eubacterium_g6	0	0	0	0	0	0	0	0	0	0	0.2629	0.6229	0.3886	0.1686	0	0	0	0	0
	Frisingicoccus	0	0	0	0	0	0	0	0	0	0	0.5457	0.5143	0.4286	0.1743	0	0	0	0	0
	Kineothrix	0	0	0	0	0	0	0	0	0	0	0.76	0.4971	0.66	0.1914	0	0	0	0	0
	Muribaculum	0	0	0	0	0	0	0	0	0	0	0.6743	0.4886	0.9829	0.2857	0	0	0	0	0
	KE159605_g	0	0	0	0	0	0	0	0	0	0	0.5543	0.4857	0.5343	0.2257	0	0	0	0	0
	Clostridium_g24	0	0	0	0	0	0	0	0	0	0	0.4486	0.4771	0.3286	0.1771	0	0	0	0	0
	FR888536_g	0	0	0	0.0029	0	0	0	0	0	0	0.42	0.3657	0.42	0.2143	0	0	0	0	0
	PAC001043_g	0	0	0	0	0	0	0	0	0	0	0.4743	0.3571	0.38	0.2114	0	0	0	0	0
	PAC001408_g	0	0	0	0	0	0	0	0	0	0	0.3743	0.3457	0.0543	0.0771	0	0	0	0	0
	PAC001066_g	0	0	0	0	0	0	0	0	0	0	0.5714	0.3343	0.6171	0.1629	0	0	0	0	0
	Agathobaculum	0	0	0	0	0	0	0	0	0	0	0.4457	0.3114	0.3171	0.0714	0	0	0	0	0
	Acetatifactor	0	0	0	0	0	0	0	0	0	0	0.3657	0.3	0.4257	0.1114	0	0	0	0	0
	Pantoea	0.0029	0.0114	0.0743	0.3371	0.8	0.0114	0.0457	0.2943	0.0029	0.0029	0.0371	0.0029	0.0057	0.2371	0	41.84	10.2629	0.4314	0.0143
	Sporobacter	0.0057	0.0029	0	0.0029	0	0	0	0	0	0.0057	0.1171	0.2086	0.12	1.9029	0	0.0029	0	0.0057	0.0086
	Apibacter	0	0	0.2257	13.5543	0.0029	0	5.4829	0	0	0.9343	0	0	0.0029	0	0.28	0	0.0057	0.0086	0.0314
	PAC002482_g	0	0	0.0029	0.0114	0	0	0	0	0.0029	0.0029	0.0029	0.0029	0.0171	1.3343	0	0	0	0	0.0029
	Franconibacter	0	0	0	0	0	0	26.9857	0.0686	0.0143	0	0	0	0	0	0	0	0	0	0
	Paenibacillus	0	0	0	0	0	0	0	0	0	0	0.0229	0	0.0314	18.0057	0	0	0	0.0029	0
	Others	0.138	0.0661	0.2262	10.5405	0.1491	0.3374	0.1374	0.8945	1.072	0.1462	12.6967	13.9607	10.109	26.6499	0.3808	0.3489	2.666	0.6778	0.8344

## Sheet: table S3
		Table S3. Alpha-diversity indices.
	Sample name	OTUs	ACE	CHAO	Jackknife	NPShannon	Shannon	Simpson	Phylogenetic Diversity
	Control_1	99	235.44	202.31	203.97	2.01	2	0.18	183
	Control_2	60	148.01	100.6	98.25	1.06	1.05	0.43	127
	Control_3	91	252.26	162.75	170.81	1.01	1	0.62	185
	Control_4	101	171.87	150.4	149.64	1.87	1.86	0.3	200
	Control_5	66	198.45	108.27	110.34	1.22	1.21	0.51	163
	nosema_1	64	82.42	86.67	87.95	1.57	1.56	0.37	142
	nosema_2	67	84.77	78.77	85	1.92	1.92	0.19	109
	nosema_3	69	81.87	82.6	86	1.91	1.9	0.21	146
	nosema_4	106	245.53	158	156.03	2.11	2.1	0.18	206
	nosema_5	78	251	168	336.96	1.84	1.84	0.21	159
	chalkbrood_1	773	851.34	853.67	895.34	4.85	4.83	0.02	1273
	chalkbrood_2	787	836.3	878.53	1011.29	4.94	4.93	0.02	1355
	chalkbrood_3	827	1082.4	1083.39	1205.48	4.56	4.53	0.03	1424
	chalkbrood_4	1177	1238.65	1304.5	1381.81	5.43	5.41	0.02	1969
	weak_1	90	147.29	148.58	207.12	1.33	1.32	0.39	211
	weak_2	81	132.19	126.09	126.82	2	1.99	0.2	165
	weak_3	67	92.83	78.77	85	1.76	1.76	0.28	128
	weak_4	103	268.63	193.46	201.38	1.64	1.63	0.29	209
	weak_5	221	1054.59	586.56	720.6	1.55	1.52	0.3	532
